# Supplementary material for: Impact of Hospitalization in an Endocrinology Department on Vaccination Coverage in People Living with Diabetes: A Real-Life Study
Source: MDPI journal article supplement (doi:10.3390/medicina58020219), 2022-02-01
Supplement: s1 [file s1]

**Supplementary Table S1. Characteristics of population at hospital admission according to coverage for Tdap (tetanus, diphtheria, pertussis), influenza and pneumococcal vaccines.**

|                             | Total       | Tdap up to date | Tdap not up to date | Tdap unknown | p    | Pneumococcal up to date | Pneumococcal not up to date | Pneumococcal unknown | p    | Influenza up to date | Influenza not up to date | Influenza unknown | p       |
|-----------------------------|-------------|-----------------|---------------------|--------------|------|-------------------------|-----------------------------|----------------------|------|----------------------|--------------------------|-------------------|---------|
| n                           | 222         | 105 (47.3)      | 73 (33.9)           | 44 (19.8%)   |      | 24 (10.8%)              | 174 (78.4%)                 | 24 (10.8%)           |      | 102 (45.9%)          | 118 (53.2%)              | 2 (0.9%)          |         |
| Age, years                  | 59.4 ± 15.2 | 57.4 ± 16.0     | 61.4 ± 13.6         | 60.9 ± 15.8  | 0.18 | 59.5 ± 18.6             | 59.7 ± 14.2                 | 56.8 ± 19.2          | 0.68 | 63.9 ± 13.0          | 55.5 (15.8)              | 56.50 ± 37.5      | 0.0002  |
| Sex male                    | 131 (59.0)  | 72 (68.6)       | 35 (47.9)           | 24 (54.5)    | 0.02 | 16 (66.7)               | 105 (60.3)                  | 10 (41.7)            | 0.16 | 72 (70.6)            | 59 (50.0)                | 0                 | 0.001   |
| Type 2 diabetes             | 152 (68.5)  | 70 (66.7)       | 53 (72.6)           | 29 (65.9)    |      | 12 (50.0)               | 126 (72.4)                  | 14 (58.3)            |      | 67 (65.7)            | 84 (71.2)                | 1 (50.0)          | 0.45    |
| Diabetes duration ≥10 years | 165 (74.3)  | 81 (77.9)       | 48 (66.7)           | 36 (81.8)    | 0.12 | 18 (75.0)               | 128 (74.4)                  | 19 (79.2)            | 0.88 | 88 (87.1)            | 77 (65.8)                | 0                 | <0.0001 |
| Admission reasons           |             |                 |                     |              | 0.03 |                         |                             |                      | 0.66 |                      |                          |                   | 0.003   |
| Imbalanced diabetes         | 140 (65.4)  | 55 (55.0)       | 53 (72.6)           | 32 (74.4)    |      | 13 (59.1)               | 113 (67.3)                  | 14 (58.3)            |      | 55 (57.3)            | 85 (73.3)                | 0                 |         |
| Diabetic foot               | 59 (27.6)   | 38 (38.0)       | 13 (17.8)           | 8 (18.6)     |      | 6 (27.3)                | 45 (26.8)                   | 8 (33.3)             |      | 30 (31.2)            | 28 (24.1)                | 1 (50.0)          |         |
| Insulin pump installation   | 15 (7.0)    | 7 (7.0)         | 5 (6.9)             | 3 (7.0)      |      | 3 (13.6)                | 10 (5.9)                    | 2 (8.4)              |      | 11 (11.5)            | 3 (2.6)                  | 1 (50.0)          |         |
| Length of stay, mean, day   | 8.8 ± 9.1   | 10.5 ± 11.1     | 7.4 ± 3.7           | 7.1 ± 8.8    | 0.03 | 9.3 ± 10.5              | 8.7 ± 8.6                   | 9.2 ± 11.2           | 0.94 | 10.1 ± 12.0          | 7.8 ± 5.3                | 7.5 ± 4.9         | 0.17    |
| Number of medications       | 7.9 ± 4.3   | 8.1 ± 4.4       | 7.8 ± 4.0           | 7.7 ± 4.3    | 0.80 | 9.3 ± 5.4               | 7.7 ± 4.0                   | 8.0 ± 4.3            | 0.22 | 9.1 ± 4.2            | 6.9 ± 4.0                | 6.0 ± 2.8         | 0.0003  |
| Insulin treatment (yes)     | 152 (68.5)  | 68 (64.8)       | 50 (68.5)           | 34 (77.3)    | 0.32 | 18 (75.0)               | 115 (66.1)                  | 19 (79.2)            | 0.33 | 77 (75.5)            | 73 (61.9)                | 2 (100.0)         | 0.06    |
| HbA1c, %                    | 8.7 ± 2.2   | 8.6 ± 2.1       | 8.7 ± 2.3           | 9.1 ± 2.1    | 0.51 | 7.9 ± 1.4               | 8.9 ± 4.5                   | 8.5 ± 2.1            | 0.11 | 8.5 ± 1.8            | 8.9 ± 2.4                | 7.9 ± 1.4         | 0.23    |
| BMI ≥30 kg/m <sup>2</sup>   | 85 (38.3)   | 36 (34.3)       | 33 (45.2)           | 16 (36.4)    |      | 9 (37.5)                | 68 (39.1)                   | 8 (33.3)             |      | 42 (41.2)            | 42 (35.6)                | 1 (50.0)          | 0.78    |

Data are mean ± SD, or n (%); BMI, body mass index, HbA1c, hemoglobin A1c.
